# Supplementary material for: Go beyond “abundance”: cross-cohort single-nucleotide-variant profiling of gut microbiota suggests a novel gut-health assessment approach
Source: Research Square preprint supplement (doi:10.21203/rs.3.rs-1747065/v1), 2022-06-17
Supplement: Supplementary file 1 [file e470c59f3dc2ed9e24e49678.xlsx]

## Sheet: description
Supplementary table description
Table S10	Discovery cohorts: SNV pattern of SCFAs gene of all samples

## Sheet: Table S10
	AS10	AS11	AS12	AS13	AS14	AS15	AS16	AS17	AS18	AS19	AS1	AS20	AS21	AS22	AS23	AS24	AS25	AS26	AS27	AS28	AS29	AS2	AS30	AS31	AS32	AS33	AS34	AS35	AS36	AS37	AS38	AS39	AS3	AS40	AS41	AS42	AS43	AS44	AS45	AS46	AS47	AS48	AS49	AS4	AS50	AS51	AS52	AS53	AS54
GUT_GENOME000004.fna	0	0	0	0	0	0	0	0	0	0	0.015528	0	0	0	0	0	0	0	0	0	0	0	0	0	0	0	0.0234579	0	0	0.0015949	0	0.00163132	0	0	0	0	0	0.0027137	0	0	0	0	0	0	0	0	0	0	0
GUT_GENOME000008.fna	0	0	0	0.0056338	0	0	0.0868794	0.03	0.0176101	0.0424799	0	0.0263692	0	0	0	0.0457698	0	0	0	0.0311573	0.0828729	0.00162602	0	0.0801688	0.0013089	0	0	0.0490654	0	0	0	0.0342577	0	0	0	0.0275229	0.0235162	0	0.0431034	0	0.0171756	0.053681	0	0	0	0	0	0	0.0247312
GUT_GENOME000092.fna	0	0	0	0.0309859	0	0	0.0567376	0.0825	0.0805031	0	0	0.0365112	0	0	0.0636364	0	0.169811	0	0.0200669	0.0637982	0.0552486	0	0.0506494	0	0.065445	0.0787402	0	0.0280374	0.124122	0.0701754	0.0678191	0	0.0101868	0.114286	0.0140056	0	0.00111982	0	0.0962644	0.0588235	0	0	0.173913	0	0.0165485	0.0912698	0.09375	0	0.00430108
GUT_GENOME000122.fna	0	0	0	0	0	0	0	0	0	0	0	0	0	0	0	0	0	0	0	0	0	0.0308943	0	0	0	0	0	0	0	0	0	0.0277325	0	0	0	0	0.012318	0	0	0	0.127863	0	0	0	0	0.0257937	0	0	0.0129032
GUT_GENOME000136.fna	0	0	0	0	0	0	0	0	0.00628931	0	0.00931677	0	0	0	0.00519481	0	0	0	0	0	0	0.0178862	0	0	0	0	0	0	0	0	0	0	0	0	0	0.00688073	0	0	0	0	0	0	0	0	0	0	0	0	0
GUT_GENOME000192.fna	0	0	0	0	0	0.00294118	0.0124113	0	0.0201258	0	0	0.0020284	0	0	0	0.00554785	0	0	0	0.00593472	0	0	0	0	0.0039267	0	0.00781929	0.0140187	0	0	0	0	0	0	0.00560224	0.0114679	0	0	0	0.00113122	0.0114504	0	0	0	0	0.015873	0.00223214	0	0
GUT_GENOME000196.fna	0	0	0	0	0	0	0	0	0	0	0.0372671	0	0	0	0	0.00277393	0	0	0	0	0	0.0276423	0	0	0	0	0.0130321	0	0	0.0398724	0	0	0	0	0	0	0	0	0	0	0.00381679	0	0	0	0	0	0	0.0316302	0
GUT_GENOME000231.fna	0	0	0	0	0	0.0147059	0	0	0.00377358	0.00344432	0	0	0	0.0643275	0	0.0180305	0	0	0.039019	0.0133531	0	0	0	0	0	0	0	0.00116822	0	0	0	0.00489396	0.0203735	0	0	0	0	0.0189959	0.0158046	0	0.00381679	0.00613497	0	0	0	0	0	0	0.00322581
GUT_GENOME000237.fna	0	0	0	0.0140845	0.0173913	0	0.00886525	0	0.00754717	0	0.015528	0.0121704	0	0	0	0.00554785	0.00628931	0.00661157	0.00557414	0.00296736	0.00690608	0.0097561	0.0012987	0	0	0.0173228	0.00521286	0.00584112	0	0	0.00664894	0	0	0	0.00560224	0.00688073	0.00335946	0.00407056	0	0.00113122	0	0	0	0	0	0.00198413	0	0	0.00215054
GUT_GENOME000285.fna	0	0	0	0.0084507	0.0724638	0	0	0	0.0188679	0	0	0	0	0	0	0.0832178	0	0	0	0	0	0	0	0.0443038	0.0719895	0	0.0477845	0.0175234	0	0	0	0	0	0	0	0	0.0593505	0	0.0316092	0.0180995	0.0133588	0.110429	0	0	0	0	0	0	0
GUT_GENOME000295.fna	0.0243902	0	0	0	0	0	0	0	0.00503145	0	0.0248447	0	0	0	0.0272727	0	0	0.00991736	0	0	0.00552486	0	0.012987	0.00843882	0	0	0	0	0	0.00318979	0.0106383	0.0261011	0	0	0	0.0206422	0	0	0.00143678	0	0.00763359	0.0107362	0	0.0224719	0	0	0	0	0
GUT_GENOME000308.fna	0	0	0	0	0	0	0	0	0	0.00114811	0	0	0.0271132	0.00584795	0	0.0249653	0.0251572	0.00495868	0.00222965	0	0	0.0195122	0.012987	0.00421941	0	0.00787402	0	0.00116822	0	0.00637959	0	0	0	0.00714286	0.0112045	0	0.012318	0.0217096	0.0114943	0	0	0.00766871	0	0	0.0283688	0.00198413	0	0	0
GUT_GENOME000367.fna	0	0	0	0.0140845	0	0	0.0425532	0	0	0	0	0	0.0701754	0	0.074026	0.0624133	0	0	0.0334448	0.0712166	0.0110497	0	0.0298701	0.0021097	0.0026178	0.0330709	0.0451781	0.0046729	0.0421546	0.0111643	0	0.0619902	0.0424448	0.0107143	0	0	0	0.0149254	0.00431034	0	0	0	0	0	0.0070922	0	0	0	0
GUT_GENOME000518.fna	0	0	0	0	0.026087	0	0.0868794	0	0.00628931	0	0.10559	0.0486815	0.108453	0.163743	0	0.00416089	0	0.166942	0.00445931	0	0	0.0471545	0.0350649	0	0	0.0629921	0.00260643	0.00233645	0	0	0.114362	0.00326264	0.27674	0	0	0.0802752	0	0.189959	0	0	0.0019084	0	0	0	0.0307329	0.0357143	0.0625	0	0
GUT_GENOME000676.fna	0	0	0	0	0	0	0	0	0	0	0	0	0.00318979	0	0	0	0	0	0	0	0	0	0	0	0	0	0.00521286	0	0	0.030303	0	0	0	0	0	0	0	0	0.00718391	0	0	0	0	0	0	0	0	0	0
GUT_GENOME000682.fna	0	0	0	0.101408	0	0	0	0.015	0.0377358	0.0229621	0	0	0	0	0	0.0277393	0	0	0.03233	0	0.0566298	0	0	0	0.0117801	0	0.0269331	0.0280374	0	0	0.0226064	0.0750408	0	0	0	0	0.031355	0	0.0215517	0.00452489	0	0.0690184	0	0	0	0	0	0	0
GUT_GENOME000706.fna	0	0	0	0	0	0	0	0	0	0	0	0	0	0	0	0	0	0	0	0.00890208	0	0	0	0	0	0	0	0	0.028103	0	0	0	0	0	0	0	0	0	0	0.00452489	0	0	0	0	0	0	0	0	0
GUT_GENOME000967.fna	0	0	0	0	0.00289855	0	0.0248227	0	0	0	0	0	0	0	0	0.00832178	0	0	0.00891862	0	0	0	0.0142857	0	0	0	0.0086881	0.00116822	0	0	0	0	0	0	0	0.0206422	0	0.0746269	0	0	0	0	0	0	0	0	0	0	0.0258065
GUT_GENOME001016.fna	0	0	0	0	0	0	0	0	0	0.00688863	0.0465839	0	0.0574163	0	0.0103896	0	0	0.00826446	0.0211817	0.00890208	0.0165746	0.0195122	0	0	0.013089	0	0.0590791	0	0.00702576	0	0	0	0	0	0	0.00458716	0	0.0664858	0.00431034	0	0	0	0.130435	0	0	0.130952	0.0178571	0.0218978	0
GUT_GENOME001023.fna	0	0	0	0	0	0	0	0	0	0	0	0	0	0	0	0	0	0	0	0	0	0	0	0	0	0	0	0	0	0	0	0	0	0	0	0.00917431	0	0	0	0	0	0	0	0	0	0	0	0	0
GUT_GENOME001056.fna	0	0	0	0	0	0	0	0	0.00251572	0	0	0	0	0	0	0	0	0	0	0	0	0	0	0	0	0	0.0104257	0	0	0	0	0	0	0	0	0	0	0.00135685	0	0	0	0	0	0	0	0	0	0	0.0258065
GUT_GENOME001115.fna	0	0	0	0	0	0	0	0	0.0477987	0.021814	0	0	0.0637959	0	0	0.0305132	0	0	0	0	0.00690608	0.0325203	0	0.056962	0	0	0.00955691	0.0116822	0	0	0.00797872	0	0.00679117	0	0	0	0.0515118	0	0	0	0	0	0	0	0	0	0	0	0.0483871
GUT_GENOME001120.fna	0	0	0	0.0760563	0.17971	0	0.0851064	0	0.0440252	0.0516648	0.0279503	0	0.0111643	0.11501	0.0233766	0.00138696	0	0	0.0468227	0.00148368	0.00828729	0.0569106	0.0272727	0.122363	0.0117801	0.0503937	0.03649	0.0642523	0	0.00318979	0.0598404	0.0554649	0.0560272	0.0232143	0	0.103211	0.0179171	0	0.0747126	0	0.0820611	0.0628834	0	0	0.070922	0	0	0	0
GUT_GENOME001261.fna	0	0	0	0	0	0	0	0	0	0	0	0	0	0	0	0	0	0	0	0	0	0	0	0	0	0	0.00173762	0	0	0.0143541	0	0	0	0	0	0	0	0	0	0	0	0	0	0	0	0	0	0	0
GUT_GENOME001297.fna	0	0	0	0.0197183	0.0376812	0	0.0248227	0	0.0150943	0.00574053	0.0186335	0	0	0	0.012987	0	0.0188679	0	0	0.0148368	0	0	0.0194805	0.00421941	0.0026178	0	0.0156386	0.00934579	0	0.00956938	0	0	0	0	0.0196078	0	0	0.0135685	0	0	0.0019084	0	0	0	0	0	0	0	0.0150538
GUT_GENOME001471.fna	0	0	0	0	0	0	0	0	0	0	0	0	0	0	0	0	0	0	0	0.00148368	0	0.0471545	0	0	0	0.0314961	0.0286707	0	0.00468384	0.0366826	0.00132979	0.00326264	0	0.0107143	0	0.00229358	0	0.00135685	0	0.00904977	0.00763359	0	0	0	0.0283688	0	0	0.0243309	0
GUT_GENOME001488.fna	0	0	0	0	0	0	0	0	0	0.0172216	0	0	0	0	0	0.0166436	0	0	0.0133779	0	0.0276243	0.0195122	0	0	0.0274869	0	0.0104257	0.021028	0	0.0223285	0.0199468	0.0195759	0	0.0321429	0	0	0.0134378	0	0.00287356	0	0.0248092	0.0153374	0	0	0.0165485	0	0	0	0.0107527
GUT_GENOME001575.fna	0	0	0	0	0	0	0	0	0	0	0	0	0	0	0.0038961	0	0	0	0	0	0	0	0	0	0.026178	0.0110236	0.0312772	0.010514	0.0444965	0	0	0	0	0	0	0	0	0	0	0	0.0209924	0	0	0	0.00945626	0	0	0.0559611	0
GUT_GENOME001587.fna	0	0	0	0	0	0	0.0035461	0	0	0	0	0.00608519	0.00318979	0	0.00519481	0	0	0	0.00334448	0.00296736	0	0.00162602	0.0025974	0.00632911	0.0052356	0.00472441	0.0295395	0.00116822	0.00234192	0.00956938	0.00664894	0.00815661	0	0	0	0	0	0.0027137	0.0100575	0.030543	0.0152672	0.00460123	0	0	0.00945626	0.00198413	0	0.00243309	0
GUT_GENOME001635.fna	0	0	0	0	0.0057971	0	0	0.005	0.00125786	0.010333	0	0.0020284	0	0	0	0.00832178	0	0	0.0111483	0.00296736	0.00138122	0	0	0.00843882	0	0	0	0.00934579	0	0	0	0	0	0	0	0.00917431	0.0055991	0	0.00143678	0.00452489	0.0019084	0.0184049	0	0	0	0	0	0	0.016129
GUT_GENOME001659.fna	0	0	0	0.0140845	0	0	0	0	0.00125786	0.0149254	0	0.0141988	0	0	0	0.0194175	0	0	0	0	0	0.00650407	0.00519481	0	0.0013089	0	0	0.00700935	0	0	0	0	0	0	0	0.0229358	0.00335946	0	0.00574713	0.0124434	0	0	0	0	0	0.0238095	0	0	0
GUT_GENOME001689.fna	0	0	0	0	0.0376812	0	0	0	0	0.010333	0	0	0.00318979	0	0.00909091	0.00554785	0	0	0	0.0296736	0.00138122	0.0146341	0.0103896	0	0.0026178	0	0.00434405	0	0	0.00318979	0.00664894	0.00815661	0.00848896	0	0	0	0.00111982	0.0189959	0.00574713	0.00678733	0.0229008	0	0	0	0	0	0	0	0
GUT_GENOME001770.fna	0	0	0	0	0	0	0.0195035	0	0.0339623	0.0114811	0.152174	0.0507099	0	0.0136452	0.0285714	0.00832178	0.0251572	0	0.00222965	0	0.0124309	0.0292683	0.0103896	0	0.0549738	0.0456693	0.0851434	0	0.058548	0.0111643	0.00797872	0.00326264	0	0.0125	0.0280112	0	0.0179171	0.00135685	0	0.0147059	0	0	0	0	0	0.00992063	0	0	0.0236559
GUT_GENOME014039.fna	0	0	0	0	0	0	0	0	0	0	0	0	0	0	0	0	0	0	0	0	0	0	0	0	0	0	0	0	0	0	0	0	0	0.00357143	0	0	0	0	0	0	0	0.00153374	0	0	0	0	0	0	0
GUT_GENOME017394.fna	0	0	0	0	0.0173913	0	0	0	0.00125786	0.00229621	0.0279503	0	0	0	0.00779221	0.00138696	0	0	0	0	0	0	0	0	0	0.0188976	0	0	0	0	0.00797872	0	0.0101868	0	0	0.00688073	0.00671892	0	0.00287356	0	0.0152672	0	0	0	0	0	0	0	0
GUT_GENOME095938.fna	0	0	0	0	0	0.0352941	0	0	0	0	0.0186335	0	0	0	0.00909091	0.00554785	0	0.00661157	0	0	0	0	0	0	0	0	0	0	0.0117096	0	0	0	0	0	0	0	0	0	0	0.00678733	0	0	0	0	0	0	0	0.00243309	0
GUT_GENOME095967.fna	0	0	0	0.0309859	0	0	0.00177305	0.0075	0.00754717	0	0	0.0141988	0.015949	0	0	0	0.0943396	0	0.0133779	0.00890208	0	0	0.0025974	0	0.0052356	0	0	0.021028	0.0257611	0.0207337	0.0146277	0	0	0.0160714	0.0532213	0	0.0111982	0.0312076	0.0100575	0.00565611	0	0.0168712	0	0	0.035461	0.0277778	0.00223214	0	0.00752688
GUT_GENOME095971.fna	0	0.079096	0	0	0	0	0.0744681	0.1975	0.0943396	0.0987371	0	0.119675	0	0	0	0.14147	0	0	0.0657748	0.0519288	0.127072	0.0146341	0	0	0	0	0.0173762	0.0525701	0	0	0	0	0	0.101786	0	0	0.113102	0	0.150862	0.0995475	0.0782443	0.133436	0	0	0	0	0	0	0.1
GUT_GENOME095979.fna	0	0	0	0	0.0144928	0	0.0124113	0.015	0	0.0264064	0	0	0.0606061	0	0	0	0	0.0181818	0	0	0	0.0715447	0	0	0.0471204	0.00629921	0.00260643	0	0	0	0	0	0.00848896	0	0	0	0	0	0	0	0	0	0	0	0	0	0.0357143	0.0486618	0.0258065
GUT_GENOME095991.fna	0	0.112994	0	0	0	0	0	0	0	0	0	0	0	0	0	0	0	0	0	0	0	0.00325203	0	0	0	0	0	0	0	0	0	0	0	0	0.0364146	0	0	0	0	0	0	0	0	0	0	0	0	0	0.016129
GUT_GENOME095993.fna	0	0	0	0	0	0	0	0	0	0	0	0	0	0	0.0194805	0	0	0.00165289	0	0	0	0	0	0	0	0	0.0112945	0	0	0.0015949	0.00398936	0	0	0	0	0	0	0.0108548	0.00143678	0.00904977	0.00572519	0	0	0	0	0	0	0.0121655	0
GUT_GENOME096063.fna	0	0	0	0	0.0144928	0	0.0195035	0	0	0	0	0	0.0191388	0	0	0	0	0.0297521	0	0.00148368	0	0	0.00519481	0.0105485	0	0	0	0	0.0444965	0	0	0	0	0	0	0.0252294	0	0.0217096	0	0	0	0	0	0	0	0	0	0	0
GUT_GENOME096067.fna	0.0139373	0	0	0	0.00869565	0.00882353	0	0	0.00503145	0.00114811	0	0	0.0111643	0	0	0	0	0	0.00111483	0.0178042	0	0.0130081	0	0	0	0	0.00695048	0	0	0.0175439	0.00398936	0.00489396	0	0.00535714	0	0	0	0.0135685	0.00574713	0	0	0	0	0	0	0.00396825	0.00223214	0.00973236	0
GUT_GENOME096080.fna	0.101045	0	0	0	0.208696	0.0294118	0.0070922	0	0	0.0183697	0.0652174	0	0	0.00974659	0.0636364	0	0	0.0165289	0.00891862	0	0.0165746	0	0.0038961	0.0274262	0	0.0015748	0.0191138	0.0455607	0	0	0.0452128	0.0342577	0.0730051	0	0	0.0275229	0	0.0257802	0	0	0.0267176	0.0230061	0	0	0	0	0.0602679	0.0121655	0
GUT_GENOME096083.fna	0	0.0564972	0	0.0591549	0.0782609	0.0441176	0.00886525	0.0275	0.0238994	0.0229621	0.0590062	0.040568	0.0111643	0.105263	0.012987	0.0776699	0.00628931	0	0.128205	0.0934718	0.0372928	0	0.0038961	0.0126582	0.117801	0.0519685	0.0512598	0.0560748	0	0.111643	0.114362	0.0897227	0.0831919	0.0732143	0.182073	0.0321101	0.0201568	0.0895522	0.0617816	0.0418552	0.0362595	0.0690184	0	0	0.115839	0.0853175	0.0267857	0.0437956	0.0494624
GUT_GENOME096166.fna	0	0	0	0.0084507	0	0	0.00177305	0	0	0.00574053	0	0.00811359	0	0	0	0	0.00628931	0	0	0	0.00828729	0	0.0467532	0	0	0	0.00695048	0.00233645	0	0	0.00398936	0	0.0135823	0	0	0	0	0	0.00143678	0.00113122	0	0.00920245	0	0	0	0	0	0	0.00107527
GUT_GENOME096174.fna	0	0	0	0	0.0550725	0	0	0.185	0	0.12744	0	0.135903	0.148325	0	0	0	0	0	0.103679	0	0.0842541	0	0.107792	0	0.149215	0.132283	0.0330148	0.0560748	0	0	0	0	0.0611205	0.0839286	0.0644258	0	0.0660694	0	0	0.0769231	0	0	0	0	0.0945626	0.109127	0	0	0.0892473
GUT_GENOME096193.fna	0	0	0	0	0.00869565	0	0	0	0	0	0	0	0	0	0	0	0	0	0	0	0	0	0	0	0	0	0	0	0	0	0	0	0	0	0	0	0	0	0	0	0	0	0	0	0	0	0	0	0.00107527
GUT_GENOME096203.fna	0.0592334	0.00564972	0	0.0140845	0.0521739	0.0794118	0.035461	0	0	0.00688863	0.068323	0.00608519	0.046252	0.079922	0.0233766	0.00832178	0	0.0793388	0.00668896	0.0296736	0.0124309	0	0.0194805	0.0780591	0	0.0551181	0.0121633	0.0280374	0	0	0.00265957	0.040783	0.0730051	0	0	0.0894495	0.0235162	0.0664858	0.00718391	0.00339367	0.019084	0	0	0	0	0	0	0	0
GUT_GENOME096210.fna	0	0	0	0	0	0.0382353	0	0	0	0	0.00621118	0	0	0	0	0	0	0.00330579	0	0	0	0	0	0	0	0	0	0	0	0	0.00132979	0	0	0	0	0	0	0.00135685	0	0	0	0	0	0	0	0	0	0.0145985	0.00107527
GUT_GENOME102353.fna	0.0313589	0	0	0	0	0.0411765	0	0	0	0	0	0	0.0015949	0	0	0	0	0.0264463	0.0122631	0	0	0.0243902	0	0	0	0	0	0	0	0	0.0226064	0	0	0	0	0	0	0	0	0	0	0	0	0	0	0	0	0.0486618	0.00537634
GUT_GENOME124777.fna	0	0	0	0	0	0	0	0	0.00251572	0	0	0	0	0	0	0	0	0	0	0.00890208	0	0	0	0	0	0	0.00608167	0	0	0	0	0	0	0	0.0336134	0	0.00111982	0	0	0	0	0	0	0	0	0	0	0	0.011828
GUT_GENOME140074.fna	0	0	0	0.0169014	0	0	0	0.0275	0.0150943	0.00574053	0.0776398	0.0020284	0.0111643	0	0.0272727	0.0138696	0.0377358	0.0247934	0.0301003	0.0118694	0.0151934	0	0.0181818	0.00843882	0.0314136	0	0.0130321	0.00116822	0.00234192	0.0143541	0.00930851	0.00163132	0	0.0339286	0.00280112	0.0252294	0.0167973	0.0176391	0.0186782	0.0271493	0	0.0168712	0.119565	0	0	0.00992063	0.0602679	0	0.0204301
GUT_GENOME140235.fna	0	0	0	0	0	0	0	0	0	0	0	0	0	0	0.0025974	0	0	0	0	0.00296736	0	0	0.00779221	0	0.0026178	0.00472441	0.0121633	0	0	0.00478469	0.00265957	0.00163132	0	0	0	0	0	0	0.00431034	0	0	0	0	0	0	0	0	0.00973236	0
GUT_GENOME140299.fna	0	0	0.300813	0.171831	0	0	0	0.1475	0	0	0	0	0	0	0	0	0.421384	0	0	0.0949555	0.0345304	0	0	0	0.0157068	0	0	0	0.11007	0	0	0	0	0	0.0168067	0	0.0503919	0	0	0	0	0	0.429348	0.662921	0	0	0.136161	0	0
GUT_GENOME140786.fna	0	0	0	0.0197183	0	0	0	0	0	0	0	0	0	0	0	0	0	0	0.0189521	0.0222552	0	0.00325203	0.0298701	0.0400844	0	0	0	0	0	0	0	0	0	0.00714286	0.00280112	0	0.012318	0.0230665	0	0.0192308	0	0	0	0	0	0	0	0	0.0182796
GUT_GENOME143131.fna	0	0	0	0.0028169	0.0753623	0	0.0443262	0.04	0	0.0229621	0.108696	0.0162272	0.0382775	0.134503	0.012987	0.0138696	0	0.0280992	0.00334448	0.0281899	0.0290055	0	0.0285714	0.021097	0.0104712	0.00472441	0.0147698	0.0759346	0	0	0.0226064	0.0146819	0	0.0125	0.0112045	0.0366972	0.0582307	0	0.00862069	0	0.0133588	0.047546	0	0	0	0	0.0625	0	0.0666667
GUT_GENOME143157.fna	0	0	0	0	0	0	0	0	0.0100629	0.021814	0	0.0020284	0	0	0	0	0	0	0	0.0074184	0	0.00487805	0.0207792	0	0	0.0125984	0.00955691	0	0.028103	0	0	0	0.0169779	0.0107143	0	0.00917431	0	0.0122117	0.00287356	0.00452489	0.0019084	0	0.0815217	0	0	0	0	0	0.0236559
GUT_GENOME143505.fna	0.390244	0.480226	0	0.284507	0.0202899	0.182353	0.246454	0.1375	0.193711	0.138921	0.0217391	0.105477	0	0.0253411	0.17013	0.159501	0	0.267769	0.164994	0.152819	0.0745856	0.295935	0.120779	0.272152	0.091623	0.0913386	0.108601	0.0654206	0.309133	0.186603	0.208777	0.24633	0	0.160714	0.254902	0.0114679	0.129899	0.0135685	0.163793	0.143665	0.219466	0.194785	0	0.292135	0.262411	0.138889	0.274554	0.347932	0.14086
GUT_GENOME143712.fna	0	0	0	0	0	0	0.00177305	0	0.0389937	0.0206659	0	0	0.0111643	0	0.0675325	0	0	0	0	0	0.0497238	0.00325203	0.0454545	0.0421941	0	0	0	0.00584112	0	0	0	0	0.0135823	0	0.0140056	0.0688073	0.0212766	0	0	0.010181	0	0	0	0	0.0472813	0	0.0133929	0	0
GUT_GENOME144544.fna	0.33101	0	0.699187	0	0	0.438235	0	0	0	0	0	0.0527383	0.0366826	0.183236	0.163636	0.0568655	0	0.226446	0	0	0	0.0211382	0.0207792	0	0.0065445	0.0472441	0	0.0514019	0	0.0318979	0	0	0.0271647	0	0.0280112	0.169725	0.06271	0.07327	0	0.0124434	0	0	0	0	0.0685579	0.0238095	0	0.121655	0
GUT_GENOME145985.fna	0	0	0	0	0	0	0	0	0.0490566	0	0	0	0	0	0	0	0	0	0	0.00148368	0	0	0	0.0611814	0.0222513	0	0	0	0	0	0	0.0163132	0	0	0	0	0	0	0	0.0237557	0	0	0	0	0	0	0	0	0
GUT_GENOME147149.fna	0	0	0	0	0.0115942	0	0	0	0.0150943	0	0.0124224	0	0.030303	0	0.0142857	0.0152566	0.0628931	0.0132231	0.0200669	0.0207715	0.0207182	0.0130081	0	0	0	0.015748	0.0243267	0	0	0.0334928	0.00664894	0.0440457	0.0220713	0.0142857	0	0	0	0.0298507	0.00143678	0.00678733	0.0419847	0	0	0	0.0212766	0.00396825	0	0.026764	0
GUT_GENOME147678.fna	0	0.152542	0	0	0	0	0.0815603	0	0.0704403	0.0470723	0	0.0811359	0.0430622	0.0448343	0.0662338	0.0221914	0	0	0.039019	0.0296736	0.0566298	0.00325203	0.0493506	0.021097	0.0562827	0.0866142	0.0434405	0.0712617	0.105386	0.103668	0.0784574	0.11093	0	0.0714286	0.0112045	0.0550459	0.0447928	0.0556309	0.00574713	0.0497738	0.0629771	0.0582822	0.0217391	0.0224719	0	0.0337302	0	0.13382	0.0537634
GUT_GENOME147854.fna	0.0383275	0	0	0.0169014	0.026087	0	0	0.0025	0.00251572	0	0	0	0	0	0	0.0124827	0	0	0	0.0148368	0.00276243	0	0	0.00421941	0.0052356	0.00314961	0.0086881	0.00233645	0	0	0.00664894	0.00978793	0.0271647	0.0125	0	0.00917431	0.00671892	0	0.00143678	0.00339367	0	0.00306748	0	0	0	0.0198413	0	0	0
GUT_GENOME157463.fna	0	0	0	0	0	0	0	0	0.00628931	0	0	0	0	0	0.0311688	0	0	0	0	0	0	0	0.00909091	0	0	0	0	0	0	0	0	0	0	0	0	0	0	0	0	0	0	0	0	0	0	0	0	0	0
GUT_GENOME233517.fna	0	0	0	0	0	0	0	0.0075	0	0.0183697	0.015528	0.020284	0	0.0292398	0	0	0	0.0280992	0.0144928	0.0178042	0	0	0.012987	0.021097	0	0	0.0173762	0.010514	0	0.00318979	0.0146277	0	0.0203735	0	0	0.0229358	0.00671892	0	0	0.010181	0.00763359	0.0153374	0	0	0	0.0178571	0	0.0243309	0.0236559
GUT_GENOME239662.fna	0.010453	0.112994	0	0.0169014	0	0.0852941	0.0035461	0	0	0.010333	0	0.00811359	0	0.0116959	0	0.0152566	0.00628931	0	0.0100334	0	0.00138122	0.0471545	0.0597403	0	0	0.0173228	0.0121633	0.0327103	0	0.0940989	0.0651596	0.0522023	0	0.0142857	0.0392157	0	0.00335946	0	0.0229885	0.0486425	0	0.00306748	0.00543478	0	0.00236407	0.047619	0	0.00243309	0.0247312
GUT_GENOME239670.fna	0	0	0	0	0	0	0	0	0	0	0	0	0.0127592	0	0.00779221	0.0332871	0	0.0330579	0	0.0118694	0	0.00162602	0.00649351	0	0	0.023622	0	0	0	0.015949	0.00398936	0	0.0322581	0.00357143	0	0	0	0	0	0.010181	0	0	0.0163043	0	0	0	0	0.00486618	0
GUT_GENOME239684.fna	0	0	0	0.0732394	0	0	0	0.0575	0.0654088	0	0	0	0	0	0	0	0	0	0.0468227	0.0816024	0.0110497	0	0.0649351	0.0400844	0.0052356	0	0.0156386	0.0735981	0	0	0	0	0	0.0178571	0.112045	0	0	0	0.0545977	0.0395928	0	0.00153374	0	0	0	0	0.109375	0	0
GUT_GENOME239725.fna	0	0	0	0	0.0289855	0	0	0.015	0	0.154994	0	0.154158	0.124402	0	0	0	0.119497	0	0.0412486	0	0.0718232	0	0.0558442	0	0.111257	0.0582677	0.0373588	0.0338785	0	0	0	0	0.0933786	0.105357	0.0504202	0	0.0515118	0	0	0.0735294	0	0	0.0217391	0	0.108747	0.107143	0	0	0.0623656
GUT_GENOME239728.fna	0	0	0	0	0	0	0	0	0.00251572	0.010333	0.0652174	0.0020284	0.0111643	0.0136452	0.0233766	0.0319001	0	0	0.0100334	0.0237389	0	0.0260163	0	0	0	0	0	0	0	0.030303	0.018617	0	0	0	0	0.043578	0.0134378	0	0.0316092	0.0350679	0.0343511	0.00766871	0	0	0.0236407	0.031746	0	0	0
GUT_GENOME247791.fna	0	0	0	0	0	0	0.00886525	0	0.045283	0.0183697	0	0.0324544	0.0191388	0	0	0.0124827	0	0	0.0144928	0.00593472	0.0303867	0.0715447	0.0168831	0	0.0196335	0.0173228	0	0.0186916	0.0515222	0.0334928	0.00930851	0	0.00339559	0	0.00280112	0.016055	0.00447928	0.0814111	0.0560345	0.0497738	0.0419847	0.0398773	0	0	0.00236407	0	0.0223214	0	0.0376344
GUT_GENOME251083.fna	0	0	0	0	0	0	0	0	0.00125786	0	0	0	0	0	0	0	0	0	0.00222965	0	0.0234807	0	0.0103896	0.0021097	0	0.00787402	0.00781929	0.00817757	0	0.0239234	0	0	0	0.0410714	0	0.0252294	0.0212766	0	0.0488506	0.0214932	0.0305344	0	0	0	0	0	0.0178571	0	0.00645161
GUT_GENOME253287.fna	0	0	0	0	0	0	0	0	0	0	0	0	0	0	0.012987	0	0	0	0	0	0	0	0	0	0	0	0	0	0	0	0	0	0	0	0	0	0	0	0	0	0	0	0	0	0	0	0	0	0
[truncated: 1,662 more columns]
